# Supplementary material for: A biodegradable nanodrug of molybdenum silicide for photothermal oncotherapy
Source: Royal Society of Chemistry journal article supplement (doi:10.1039/d0nj00762e), 2020-01-01
Supplement: d0nj00762e1.pdf [file d0nj00762e1.pdf]

# Biodegradable Nanodrug of Molybdenum Silicide for the Photothermal Oncotherapy

Changjiu Gao,<sup>a</sup> Chune Liang,<sup>b</sup> Qing Wang,<sup>b</sup> Wenchao Li,<sup>a</sup> Qichao Liang,<sup>a</sup> Chunhui Wang,<sup>a</sup> Lili Chen<sup>\*b</sup>

---

<sup>a</sup> *College of pharmacy, Mudanjiang Medical University, Heilongjiang Mudanjiang, 157011, China*

<sup>b</sup> *Hongqi Hospital Affiliated to Mudanjiang Medical University, Heilongjiang Mudanjiang, 157011, China.*

† E-mail: zhantao6666@126.com; gaochangjiu1983@sina.com

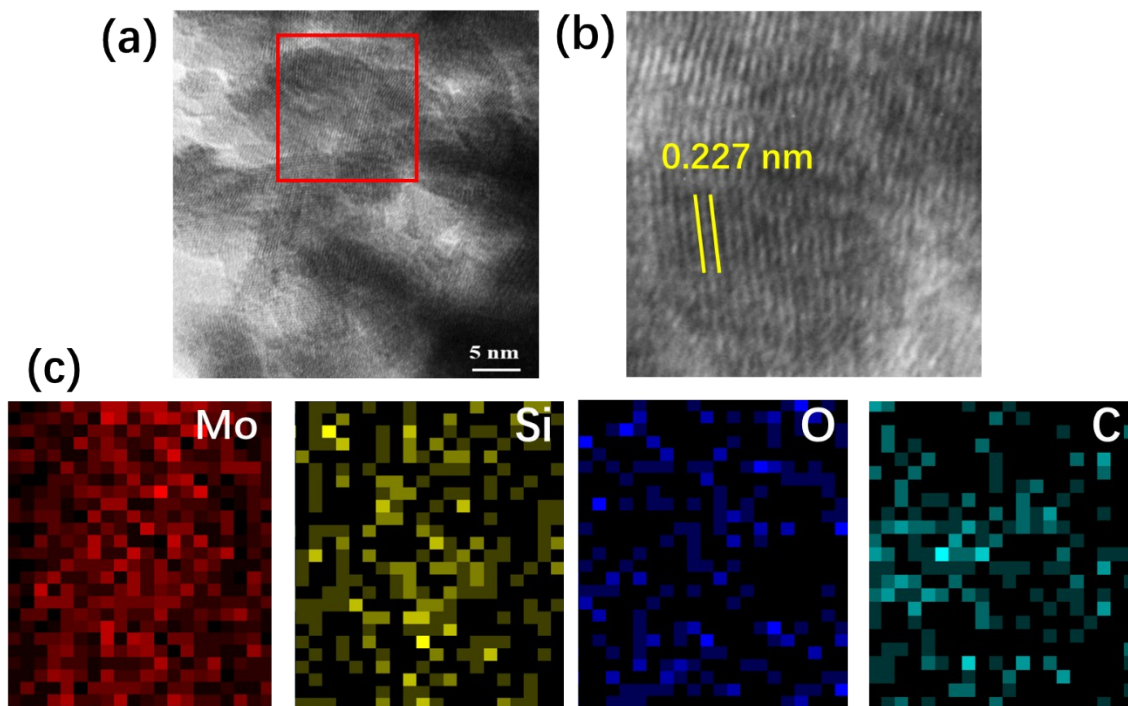

Figure S1. (a) - (b) HR-TEM images and (c) EDS mapping of MoSi<sub>2</sub>. (The red pane in Fig S1 is the EDS area)
